# Supplementary material for: Syntheses, structures, luminescent and photocatalytic properties of various polymers based on a “V”-shaped dicarboxylic acid
Source: Royal Society of Chemistry journal article supplement (doi:10.1039/c6ra27509e), 2017-01-01
Supplement: c6ra27509e1.pdf [file c6ra27509e1.pdf]

**Table S1** Selected bond lengths (Å) and angles (°) for **1-4**

| Complex 1                                                  |            |                                              |            |
|------------------------------------------------------------|------------|----------------------------------------------|------------|
| Cd(1)-O(1)                                                 | 2.248(5)   | Cd(1)-N(2)                                   | 2.283(5)   |
| Cd(1)-O(1) <sup>#1</sup>                                   | 2.248(5)   | Cd(1)-O(2)                                   | 2.545(6)   |
| Cd(1)-N(2) <sup>#1</sup>                                   | 2.283(5)   | Cd(1)-O(2) <sup>#1</sup>                     | 2.545(6)   |
| O(1)-Cd(1)-O(1) <sup>#1</sup>                              | 158.3(3)   | O(1)-Cd(1)-N(2) <sup>#1</sup>                | 107.42(19) |
| O(1) <sup>#1</sup> -Cd(1)-N(2) <sup>#1</sup>               | 84.40(17)  | O(1)-Cd(1)-N(2)                              | 84.40(17)  |
| O(1) <sup>#1</sup> -Cd(1)-N(2)                             | 107.42(19) | N(2) <sup>#1</sup> -Cd(1)-N(2)               | 115.1(3)   |
| O(1)-Cd(1)-O(2)                                            | 52.66(15)  | O(1) <sup>#1</sup> -Cd(1)-O(2)               | 111.10(18) |
| N(2) <sup>#1</sup> -Cd(1)-O(2)                             | 88.9(2)    | N(2)-Cd(1)-O(2)                              | 136.19(16) |
| O(1)-Cd(1)-O(2) <sup>#1</sup>                              | 111.10(18) | O(1) <sup>#1</sup> -Cd(1)-O(2) <sup>#1</sup> | 52.66(15)  |
| N(2) <sup>#1</sup> -Cd(1)-O(2) <sup>#1</sup>               | 136.19(16) | N(2)-Cd(1)-O(2) <sup>#1</sup>                | 88.9(2)    |
| O(2)-Cd(1)-O(2) <sup>#1</sup>                              | 98.1(3)    | O(1)-Cd(1)-C(1) <sup>#1</sup>                | 135.5(2)   |
| O(1) <sup>#1</sup> -Cd(1)-C(1) <sup>#1</sup>               | 26.59(17)  | N(2) <sup>#1</sup> -Cd(1)-C(1) <sup>#1</sup> | 110.5(2)   |
| N(2)-Cd(1)-C(1) <sup>#1</sup>                              | 99.6(2)    | O(2)-Cd(1)-C(1) <sup>#1</sup>                | 105.48(18) |
| O(2) <sup>#1</sup> -Cd(1)-C(1) <sup>#1</sup>               | 26.09(16)  |                                              |            |
| Symmetry codes: #1: -x+3/2,y,-z+1                          |            |                                              |            |
| Complex 2                                                  |            |                                              |            |
| Cd(1)-N(4) <sup>#1</sup>                                   | 2.306(4)   | Cd(1)-O(2)                                   | 2.320(3)   |
| Cd(1)-N(2)                                                 | 2.322(4)   | Cd(1)-N(5)                                   | 2.326(4)   |
| Cd(1)-O(4)                                                 | 2.376(4)   | Cd(1)-O(3)                                   | 2.527(4)   |
| Cd(1)-O(1)                                                 | 2.580(4)   |                                              |            |
| N(4) <sup>#1</sup> -Cd(1)-O(2)                             | 139.11(16) | N(4) <sup>#1</sup> -Cd(1)-N(2)               | 93.72(14)  |
| O(2)-Cd(1)-N(2)                                            | 89.72(13)  | N(4) <sup>#1</sup> -Cd(1)-N(5)               | 87.88(15)  |
| O(2)-Cd(1)-N(5)                                            | 86.67(14)  | N(2)-Cd(1)-N(5)                              | 175.99(14) |
| N(4) <sup>#1</sup> -Cd(1)-O(4)                             | 134.16(14) | O(2)-Cd(1)-O(4)                              | 86.04(14)  |
| N(2)-Cd(1)-O(4)                                            | 93.91(15)  | N(5)-Cd(1)-O(4)                              | 87.59(15)  |
| N(4) <sup>#1</sup> -Cd(1)-O(3)                             | 82.66(17)  | O(2)-Cd(1)-O(3)                              | 138.17(17) |
| N(2)-Cd(1)-O(3)                                            | 89.24(16)  | N(5)-Cd(1)-O(3)                              | 94.61(16)  |
| O(4)-Cd(1)-O(3)                                            | 52.34(15)  | N(4) <sup>#1</sup> -Cd(1)-O(1)               | 87.04(15)  |
| O(2)-Cd(1)-O(1)                                            | 52.23(13)  | N(2)-Cd(1)-O(1)                              | 89.40(14)  |
| N(5)-Cd(1)-O(1)                                            | 87.01(14)  | O(4)-Cd(1)-O(1)                              | 138.15(14) |
| O(3)-Cd(1)-O(1)                                            | 169.50(15) |                                              |            |
| Symmetry codes: #1: -x+1,-y+1,-z+2 #2: x,y-1,z #3: x,y+1,z |            |                                              |            |
| Complex 3                                                  |            |                                              |            |
| Zn(1)-O(1)                                                 | 1.940(2)   | Zn(1)-O(1) <sup>#1</sup>                     | 1.940(2)   |
| Zn(1)-N(2)                                                 | 2.019(2)   | Zn(1)-N(2) <sup>#1</sup>                     | 2.019(2)   |
| O(1)-Zn(1)-O(1) <sup>#1</sup>                              | 112.25(14) | O(1)-Zn(1)-N(2)                              | 119.38(9)  |
| O(1) <sup>#1</sup> -Zn(1)-N(2)                             | 103.61(9)  | O(1)-Zn(1)-N(2) <sup>#1</sup>                | 103.61(9)  |
| O(1) <sup>#1</sup> -Zn(1)-N(2) <sup>#1</sup>               | 119.38(9)  | N(2)-Zn(1)-N(2) <sup>#1</sup>                | 98.74(14)  |
| C(1)-N(2)-Zn(1)                                            | 134.2(2)   | C(2)-N(2)-Zn(1)                              | 121.0(2)   |
| C(10)-O(1)-Zn(1)                                           | 118.1(2)   |                                              |            |
| Symmetry codes: #1: -x+1,y,-z+3/2 #2: -x+3/2,-y+5/2,-z+2   |            |                                              |            |
| Complex 4                                                  |            |                                              |            |

|                                |          |                                |          |
|--------------------------------|----------|--------------------------------|----------|
| Cd(1)-N(2)                     | 2.231(7) | Cd(1)-N(3)                     | 2.314(8) |
| Cd(1)-O(1)                     | 2.316(6) | Cd(1)-O(3)                     | 2.351(6) |
| Cd(1)-O(2) <sup>#1</sup>       | 2.390(6) | Cd(1)-O(4)                     | 2.496(6) |
| Cd(1)-O(2)                     | 2.622(6) | Cd(1)-C(8)                     | 2.757(9) |
| N(2)-Cd(1)-N(3)                | 163.8(3) | N(2)-Cd(1)-O(1)                | 108.1(2) |
| N(3)-Cd(1)-O(1)                | 86.5(3)  | N(2)-Cd(1)-O(3)                | 96.2(2)  |
| N(3)-Cd(1)-O(3)                | 91.4(3)  | O(1)-Cd(1)-O(3)                | 87.1(2)  |
| N(2)-Cd(1)-O(2) <sup>#1</sup>  | 81.0(2)  | N(3)-Cd(1)-O(2) <sup>#1</sup>  | 84.6(3)  |
| O(1)-Cd(1)-O(2) <sup>#1</sup>  | 127.5(2) | O(3)-Cd(1)-O(2) <sup>#1</sup>  | 144.6(2) |
| N(2)-Cd(1)-O(4)                | 86.7(2)  | N(3)-Cd(1)-O(4)                | 86.2(3)  |
| O(1)-Cd(1)-O(4)                | 139.8(2) | O(3)-Cd(1)-O(4)                | 53.5(2)  |
| O(2) <sup>#1</sup> -Cd(1)-O(4) | 91.1(2)  | N(2)-Cd(1)-O(2)                | 87.6(2)  |
| N(3)-Cd(1)-O(2)                | 96.6(2)  | O(1)-Cd(1)-O(2)                | 51.7(2)  |
| O(3)-Cd(1)-O(2)                | 137.2(2) | O(2) <sup>#1</sup> -Cd(1)-O(2) | 78.1(2)  |
| O(4)-Cd(1)-O(2)                | 168.5(2) | N(2)-Cd(1)-C(8)                | 92.2(3)  |
| N(3)-Cd(1)-C(8)                | 88.1(3)  | O(1)-Cd(1)-C(8)                | 113.3(3) |
| O(3)-Cd(1)-C(8)                | 26.7(2)  | O(2) <sup>#1</sup> -Cd(1)-C(8) | 118.0(2) |
| O(4)-Cd(1)-C(8)                | 26.9(2)  | O(2)-Cd(1)-C(8)                | 163.7(2) |

Symmetry codes: #1: -x+1,y,-z+3/2 #2: x,y+1,z #3: x+1,y,z #4: x-1,y,z #5: -x,y,-z+1/2

**Table S2** Specified hydrogen bond distances (Å) and angles (°) of complex **4**

| D-H...A                   | d(D-H) | d(H...A) | d(D...A)  | <DHA  |
|---------------------------|--------|----------|-----------|-------|
| C28-H28...O3 <sup>i</sup> | 0.93   | 2.41     | 3.287(11) | 156.9 |
| C21-H21...O3 <sup>i</sup> | 0.93   | 2.43     | 3.341(11) | 166.0 |

Symmetry code: (i) 1 - x, 1 - y, 1 - z.

**Table S3** The coordination modes of H<sub>2</sub>dpb ligand and the roles of ancillary ligands in complexes **1-4**

| Complex  | Coord. modes | Ancillary ligands/role | Dihedral angles (°) of H <sub>2</sub> dpb | Structure and topology                                                                                                                  |
|----------|--------------|------------------------|-------------------------------------------|-----------------------------------------------------------------------------------------------------------------------------------------|
| <b>1</b> | Mode I       | Bimb/bridging          | 42.04(7)/59.69(9)/32.43(7)                | 2D + 2D → 3D<br>(2,2,4)-connected<br>(12 <sup>5</sup> ·16)(12) <sup>2</sup> unprecedented<br>2-fold interpenetrated<br>network          |
| <b>2</b> | Mode I       | Tib/bridging           | 32.85(2)/31.12(2)/31.85(1)                | 2D → 3D (2,3,5)-connected<br>(4 <sup>2</sup> ·6·8 <sup>6</sup> ·12)(4 <sup>2</sup> ·6)(8)<br>unprecedented 3D<br>supramolecular network |
| <b>3</b> | Mode II      | 4,4'-Bibp/bridging     | 18.78(4)/34.31(3)/47.91(4)                | 1D chain → 3D<br>supramolecular structure                                                                                               |
| <b>4</b> | Mode III     | 1,3-Bitl/bridging      | 35.78(2)/27.96(3)/19.18(3)                | 2D → 3D 4-connected 3D<br>supramolecular network                                                                                        |

**Table S4** Wavelengths of the emissionmaxima and excitation (nm) of **1-4** and free organic ligands at room temperature

| Complex/ligand     | $\lambda_{ex}/nm$ | $\lambda_{em}/nm$ |
|--------------------|-------------------|-------------------|
| <b>1</b>           | 275               | 375               |
| <b>2</b>           | 270               | 369               |
| <b>3</b>           | 265               | 376               |
| <b>4</b>           | 255               | 383               |
| H <sub>2</sub> dpb | 275               | 405               |
| Tib                | 275               | 371               |
| 4,4'-bibp          | 270               | 378               |
| Bimb               | 220               | 380               |
| 1,3-bitl           | 280               | 385               |

**Table S5** The degradation ratio of MB in Cd(II)/Zn(II) CPs

| Coordination Polymer                                                                                | MB Degradation Ratio (%) | Time (min) |
|-----------------------------------------------------------------------------------------------------|--------------------------|------------|
| [Cd <sub>3</sub> (3,4'-tmbpt) <sub>2</sub> (L) <sub>2</sub> (H <sub>2</sub> O)]·1.5H <sub>2</sub> O | 50                       | 90         |
| [NaCd <sub>3</sub> (4,4'-tmbpt)(L) <sub>2</sub> (OH)]·H <sub>2</sub> O                              | 60                       | 90         |
| {[Zn(4-bpah)(1,3-BDC)(H <sub>2</sub> O)] <sub>n</sub> }                                             | 31                       | 160        |
| {[Cd(4-bpah)(1,3-BDC)] <sub>n</sub> }                                                               | 33                       | 160        |
| {[Cd(3-bpah)(1,3-BDC)]·H <sub>2</sub> O} <sub>n</sub> }                                             | 35                       | 160        |

**Fig. S1**

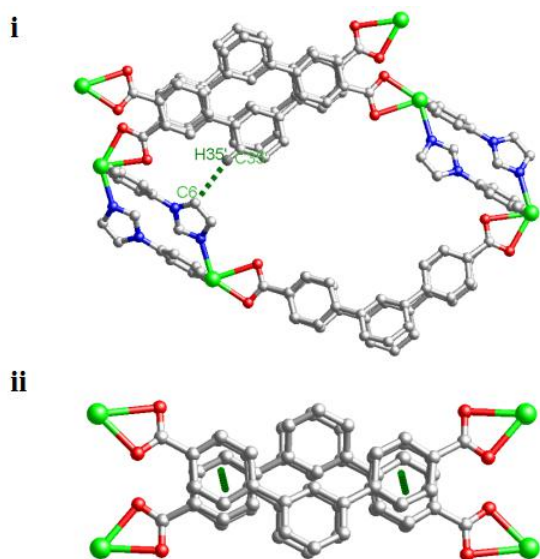

**Fig. S1** The C-H···C and  $\pi$ - $\pi$  interactions.

Fig. S2

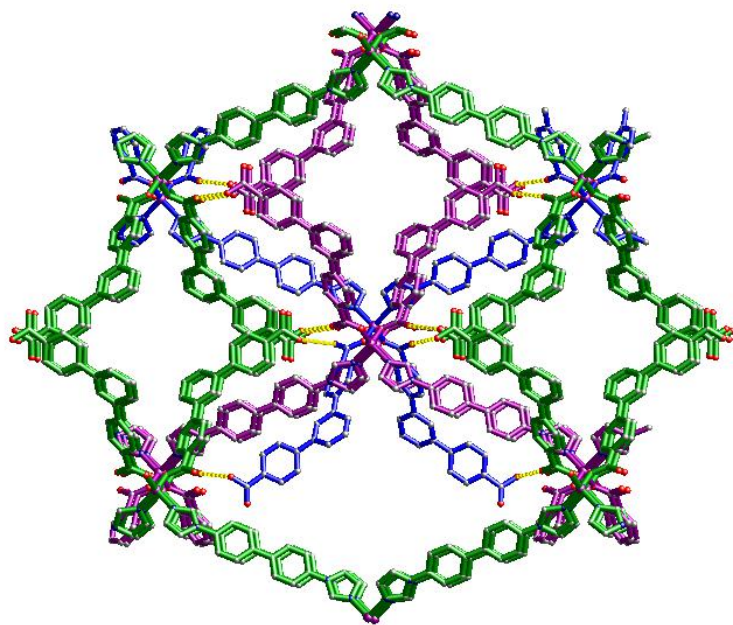

Fig. S2 The O-H...O hydrogen bonds along [1,1,0] orientation.

Fig. S3

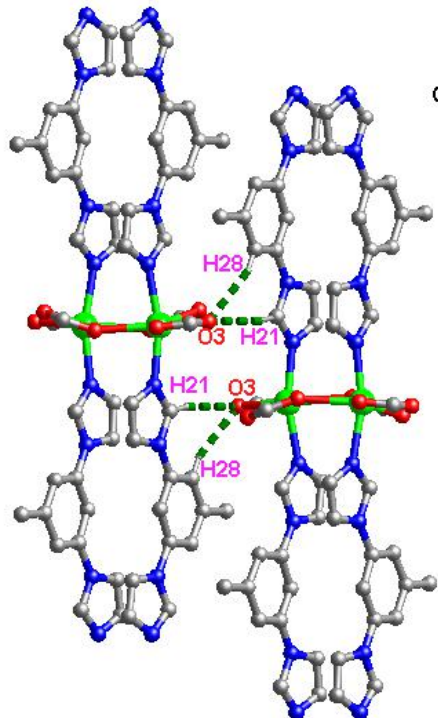

Fig. S3 The C-H...O bonds along [0,1,1] orientation.

Fig. S4

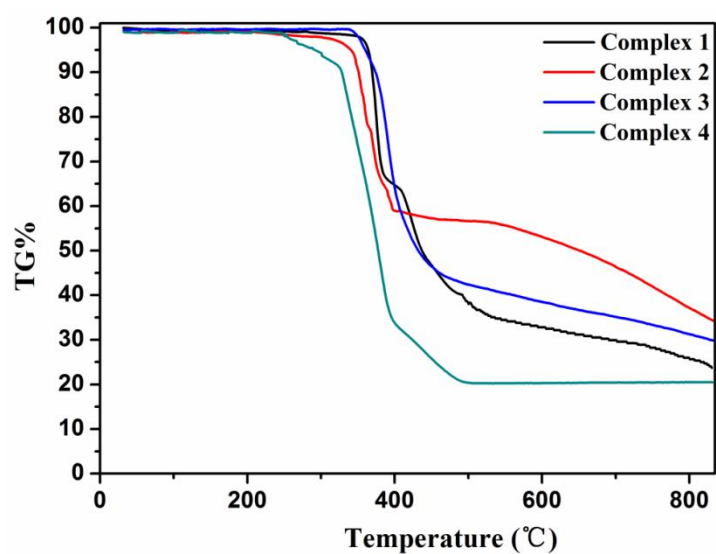

Fig. S4 The TGA curves for complexes 1-4.

Fig. S5

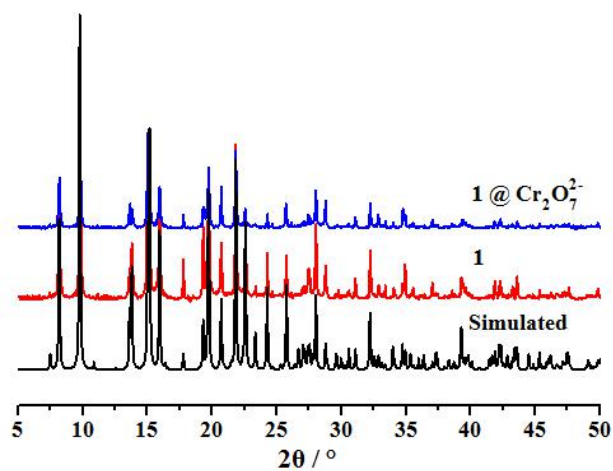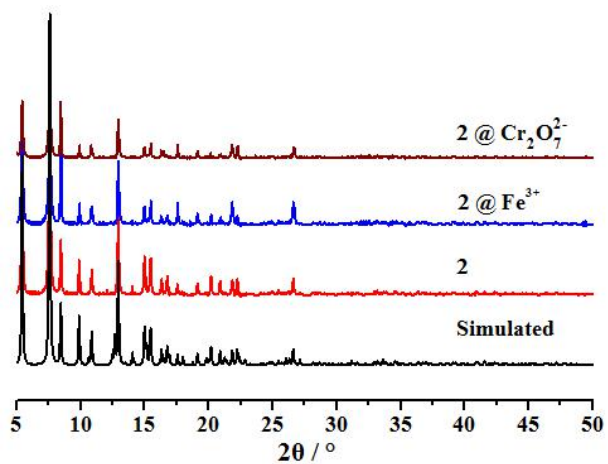

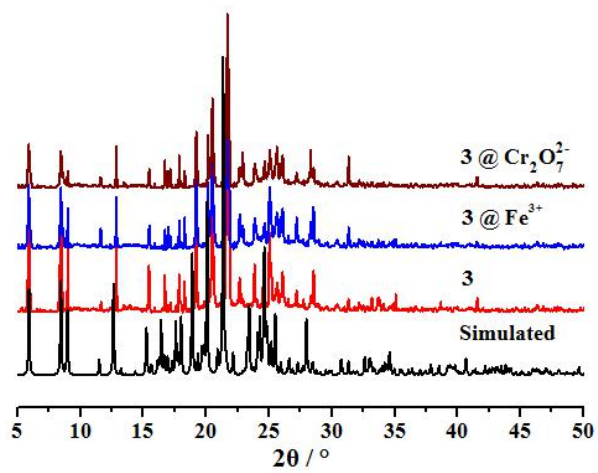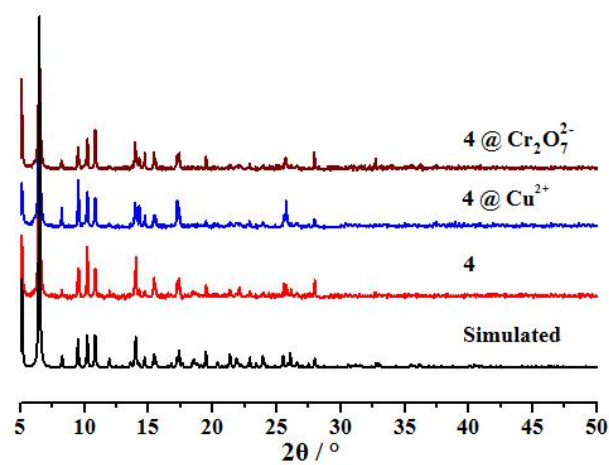

**Fig. S5** PXRD patterns of simulated , 2-4 @  $\text{Fe}^{3+}/\text{Cu}^{2+}$  and 1-4 @  $\text{Cr}_2\text{O}_7^{2-}$ .

**Fig. S6 (a-c)**

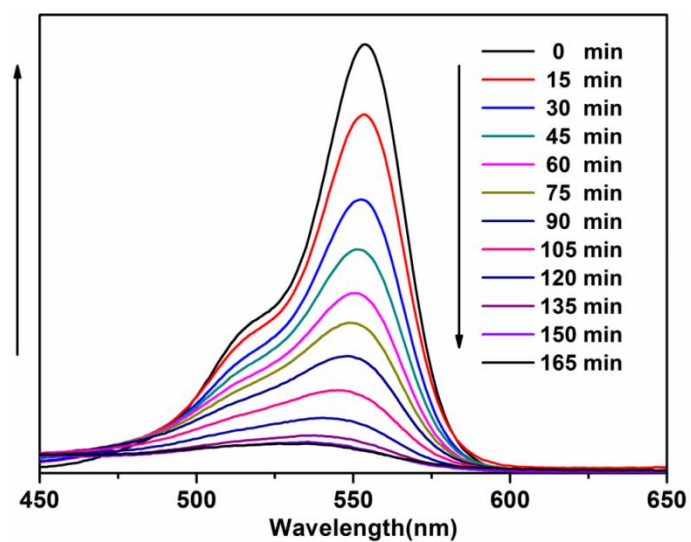

**Fig. S6 (a)** Absorption spectra of the RhB solution in the presence of complex **1**.

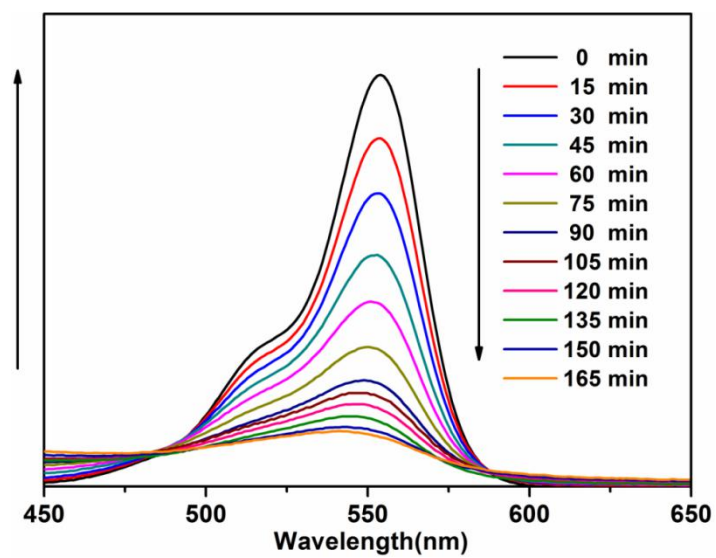

**Fig. S6 (b)** Absorption spectra of the RhB solution in the presence of complex 2.

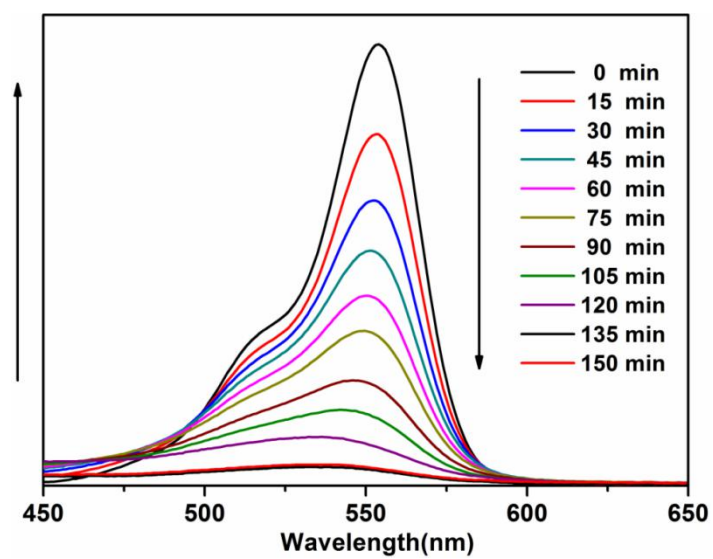

**Fig. S6 (c)** Absorption spectra of the RhB solution in the presence of complex 4.

**Fig. S7 (a-c)**

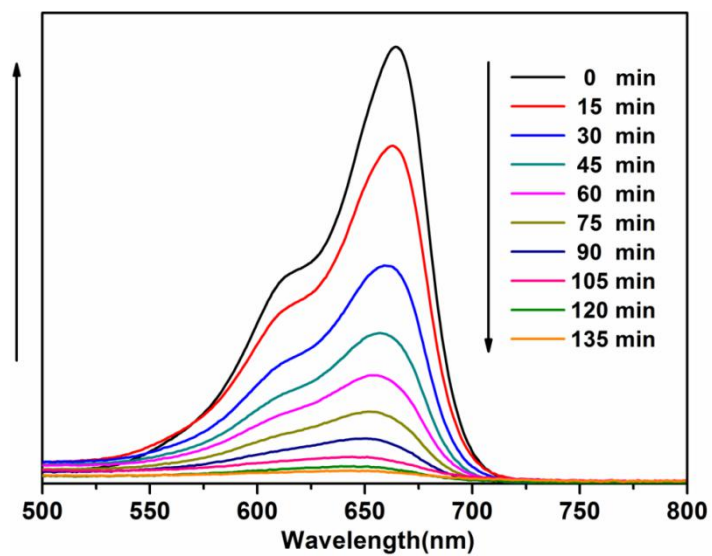

**Fig. S7 (a)** Absorption spectra of the MB solution in the presence of complex 1.

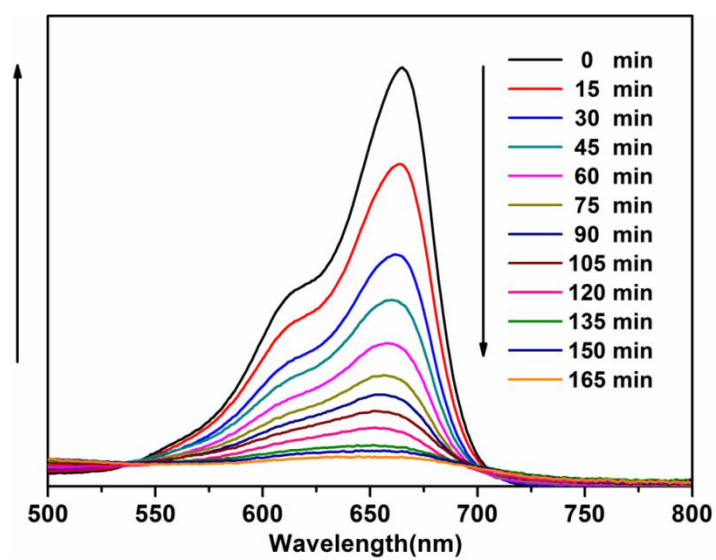

**Fig. S7 (b)** Absorption spectra of the MB solution in the presence of complex 2.



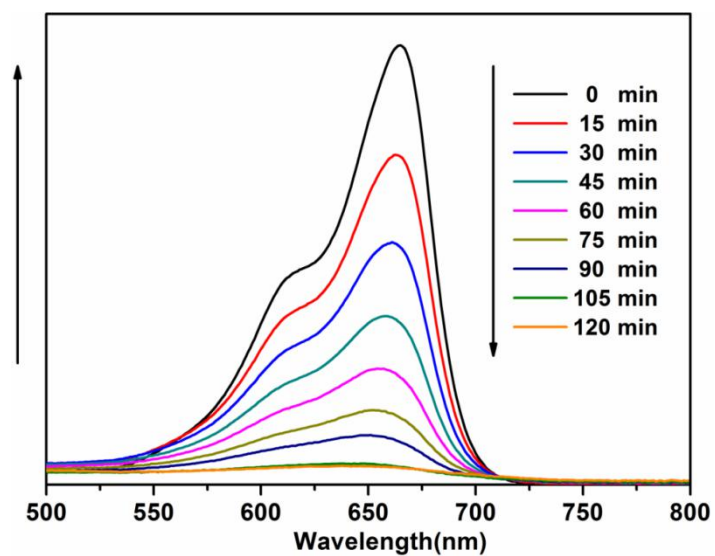

Fig. S7 (c) Absorption spectra of the MB solution in the presence of complex 4.

Fig. S8

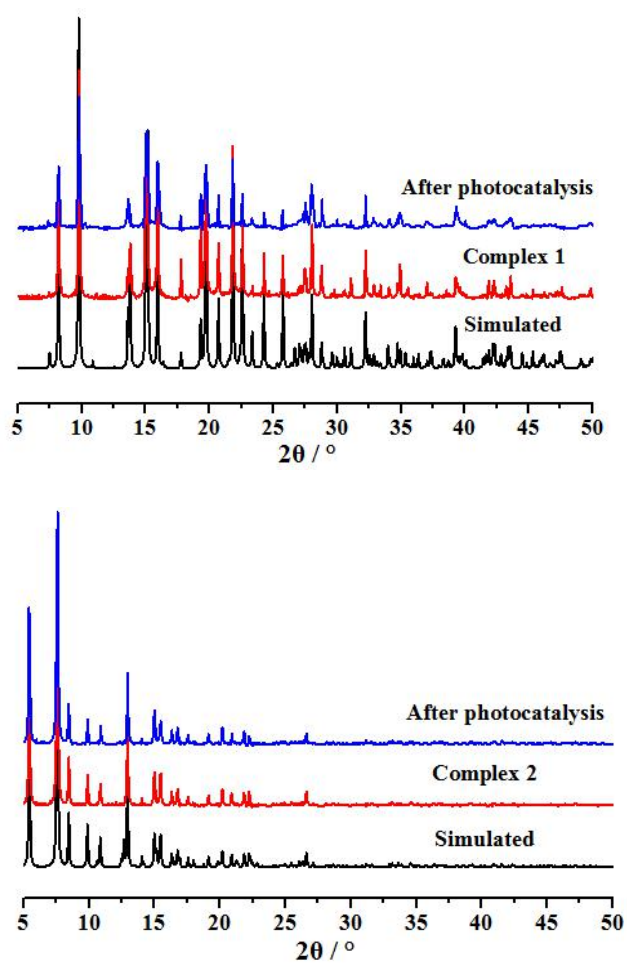

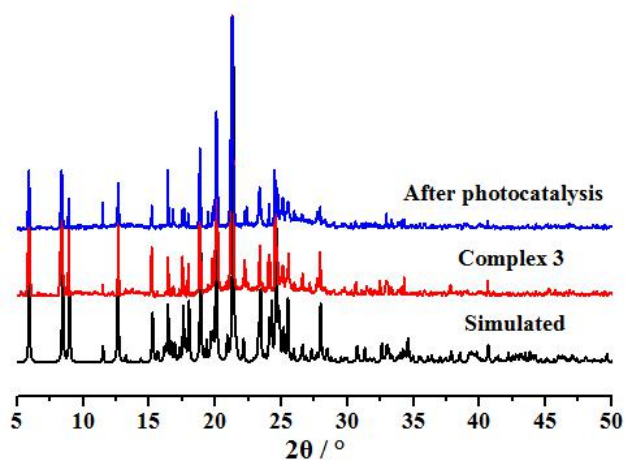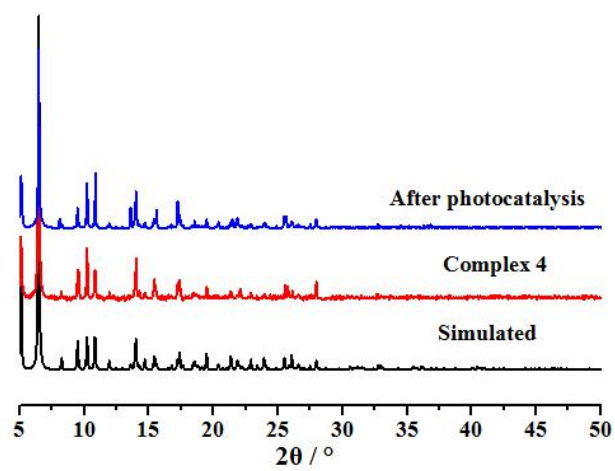

**Fig. S8** PXRD patterns of complexes 1-4 before and after photocatalysis process.
